# Supplementary material for: The Complete Plastid Genome Sequence of Madagascar Periwinkle Catharanthus roseus (L.) G. Don: Plastid Genome Evolution, Molecular Marker Identification, and Phylogenetic Implications in Asterids
Source: PubMed Central journal article supplement (PMC3688999; doi:10.1371/journal.pone.0068518), 2013-06-18
Supplement: pone.0068518.s001.pdf [file pone.0068518.s001.pdf]

**Table S1.** Accession numbers of plastome sequences of asterids included in phylogenetic analyses.

| Higher taxa                 | Order                             | Family        | Taxon <sup>a</sup>                                     | No. of SSRs <sup>b</sup>                                          | Accession No.                                                                           | Genes absent <sup>c</sup> |                                       |             |
|-----------------------------|-----------------------------------|---------------|--------------------------------------------------------|-------------------------------------------------------------------|-----------------------------------------------------------------------------------------|---------------------------|---------------------------------------|-------------|
| Eurosids II                 | Brassicales                       | Brassicaceae  | <i>Arabidopsis thaliana</i>                            | 104                                                               | NC_000932.1                                                                             | -                         |                                       |             |
| Caryophyllales              | Caryophyllales                    | Amaranthaceae | <i>Spinacia oleracea</i>                               | 65                                                                | NC_002202.1                                                                             | <i>rpl23</i>              |                                       |             |
| Basal Asterids              | Cornales                          | Cornaceae     | <i>Cornus florida</i> <sup>d</sup>                     | -                                                                 | EU002157, EU002175, EU002215, EU002276, EU002311, EU002377, EU002491, GQ998074-GQ998146 | -                         |                                       |             |
| Euasterids I                | Ericales                          | Myrsinaceae   | <i>Ardisia polysticta</i>                              | 57                                                                | KC465962                                                                                | -                         |                                       |             |
|                             |                                   | Theaceae      | <i>Camellia sinensis</i>                               | 69                                                                | NC_020019.1                                                                             | -                         |                                       |             |
|                             | Garryales                         | Boraginaceae  | <i>Ehretia acuminata</i> <sup>d</sup>                  | -                                                                 | GQ997215-GQ997297                                                                       | -                         |                                       |             |
|                             |                                   | Garryaceae    | <i>Aucuba japonica</i> <sup>d</sup>                    | -                                                                 | GQ997049-GQ997131                                                                       | -                         |                                       |             |
|                             | Gentianales                       | Apocynaceae   | <i>Asclepias syriaca</i> (with two unresolved regions) | ≥103                                                              | JF433943                                                                                | <i>accD, clpP, ycfI</i>   |                                       |             |
|                             |                                   |               | <i>Catharanthus roseus</i>                             | 56                                                                | KC561139                                                                                | -                         |                                       |             |
|                             |                                   |               | <i>Nerium oleander</i> <sup>d</sup>                    | -                                                                 | GQ997630-GQ997712                                                                       | -                         |                                       |             |
|                             |                                   | Lamiales      | Rubiaceae                                              | <i>Coffea arabica</i>                                             | 43                                                                                      | NC_008535.1               | -                                     |             |
|                             |                                   |               | Gesneriaceae                                           | <i>Boea hygrometrica</i>                                          | 27                                                                                      | NC_016468.1               | -                                     |             |
|                             |                                   |               |                                                        | Lamiaceae                                                         | <i>Tectona grandis</i>                                                                  | 51                        | NC_020098.1                           | -           |
|                             |                                   |               | Oleaceae                                               | <i>Jasminum nudiflorum</i>                                        | 68                                                                                      | NC_008407.1               | <i>accD</i>                           |             |
|                             |                                   |               |                                                        | <i>Olea europaea</i> cv. <i>Bianchera</i>                         | 68                                                                                      | NC_013707.2               | -                                     |             |
|                             |                                   |               |                                                        | <i>Olea europaea</i> subsp. <i>cuspidata</i>                      | 57                                                                                      | NC_015604.1               | -                                     |             |
|                             |                                   |               |                                                        | <i>Olea europaea</i> subsp. <i>europaea</i> cv. <i>Manzanilla</i> | 65                                                                                      | NC_015401.1               | -                                     |             |
|                             |                                   |               |                                                        | <i>Olea europaea</i> subsp. <i>maroccana</i>                      | 65                                                                                      | NC_015623.1               | -                                     |             |
|                             |                                   |               |                                                        | <i>Olea woodiana</i> subsp. <i>woodiana</i>                       | 70                                                                                      | NC_015608.1               | -                                     |             |
|                             |                                   |               |                                                        | Pedaliaceae                                                       | <i>Sesamum indicum</i>                                                                  | 35                        | NC_016433.2                           | -           |
|                             |                                   |               |                                                        | Plantaginaceae                                                    | <i>Antirrhinum majus</i> <sup>d</sup>                                                   | -                         | GQ996966-GQ997048                     | -           |
|                             |                                   |               | Solanales                                              | Convolvulaceae                                                    | <i>Ipomoea purpurea</i>                                                                 | 64                        | NC_009808.1                           | -           |
| Solanaceae                  |                                   |               |                                                        |                                                                   | <i>Atropa belladonna</i>                                                                | 60                        | NC_004561.1                           | -           |
| Solanaceae                  |                                   |               |                                                        | <i>Capsicum annuum</i>                                            | 46                                                                                      | NC_018552.1               | -                                     |             |
|                             | <i>Datura stramonium</i>          | 49            |                                                        | NC_018117.1                                                       | -                                                                                       |                           |                                       |             |
|                             | <i>Nicotiana tabacum</i>          | 60            |                                                        | NC_001879.2                                                       | -                                                                                       |                           |                                       |             |
|                             | <i>Nicotiana tomentosiformis</i>  | 61            |                                                        | NC_007602.1                                                       | -                                                                                       |                           |                                       |             |
|                             | <i>Nicotiana glauca</i>           | 59            |                                                        | NC_007500.1                                                       | -                                                                                       |                           |                                       |             |
|                             | <i>Nicotiana undulata</i>         | 63            |                                                        | NC_016068.1                                                       | -                                                                                       |                           |                                       |             |
|                             | <i>Solanum bulbocastanum</i>      | 56            |                                                        | NC_007943.1                                                       | -                                                                                       |                           |                                       |             |
|                             | <i>Solanum lycopersicum</i>       | 56            |                                                        | NC_007898.2                                                       | -                                                                                       |                           |                                       |             |
|                             | <i>Solanum tuberosum</i>          | 53            |                                                        | NC_008096.2                                                       | -                                                                                       |                           |                                       |             |
|                             | Euasterids II                     | Apiales       |                                                        | Apiaceae                                                          | <i>Anthriscus cerefolium</i>                                                            | 71                        | NC_015113.1                           | -           |
|                             | <i>Crithmum maritimum</i>         |               |                                                        |                                                                   | 75                                                                                      | NC_015804.1               | -                                     |             |
|                             | <i>Daucus carota</i>              |               |                                                        |                                                                   | 67                                                                                      | NC_008325.1               | -                                     |             |
| <i>Oxypholis greenmanii</i> | 61                                |               | NC_015832.1                                            |                                                                   | -                                                                                       |                           |                                       |             |
| <i>Petroselinum crispum</i> | 60                                |               | NC_015821.1                                            |                                                                   | -                                                                                       |                           |                                       |             |
| Araliaceae                  | <i>Eleutherococcus senticosus</i> |               | 42                                                     |                                                                   | NC_016430.1                                                                             | -                         |                                       |             |
|                             | <i>Hydrocotyle</i> sp.            |               | 46                                                     |                                                                   | NC_015818.1                                                                             | -                         |                                       |             |
|                             | <i>Panax ginseng</i>              |               | 37                                                     |                                                                   | NC_006290.1                                                                             | -                         |                                       |             |
|                             | Aquifoliales                      |               | Aquifoliaceae                                          |                                                                   | <i>Ilex cornuta</i> <sup>d</sup>                                                        | -                         | GQ997298-GQ997380                     | -           |
| Asterales                   | Asteraceae                        |               | <i>Ageratina adenophora</i>                            |                                                                   | 33                                                                                      | NC_015621.1               | -                                     |             |
|                             |                                   |               | <i>Guizotia abyssinica</i>                             |                                                                   | 51                                                                                      | NC_010601.1               | -                                     |             |
|                             |                                   |               | <i>Helianthus annuus</i>                               | 52                                                                | NC_007977.1                                                                             | -                         |                                       |             |
|                             |                                   |               | <i>Jacobaea vulgaris</i>                               | 58                                                                | NC_015543.1                                                                             | -                         |                                       |             |
|                             |                                   |               | <i>Lactuca sativa</i>                                  | 38                                                                | NC_007578.1                                                                             | -                         |                                       |             |
|                             |                                   |               | <i>Parthenium argentatum</i>                           | 53                                                                | NC_013553.1                                                                             | -                         |                                       |             |
|                             |                                   |               | Campanulaceae                                          | <i>Trachelium caeruleum</i>                                       | 57                                                                                      | NC_010442.1               | <i>accD, clpP, rpl23, ndhK</i>        |             |
|                             |                                   |               | Goodeniaceae                                           | <i>Scaevola aemula</i> <sup>d</sup>                               | -                                                                                       | EU017139-EU017217         | <i>accD, clpP, ycfI, rps11, rpoC2</i> |             |
|                             |                                   |               | Dipsacales                                             | Caprifoliaceae                                                    | <i>Lonicera japonica</i> <sup>d</sup>                                                   | -                         | GQ997381-GQ997463                     | <i>accD</i> |

<sup>a</sup>Taxa included in Figure 4 are in bold.<sup>b</sup>Mono-, di-, tri-, tetra-, penta- and hexanucleotides with a length of at least 10 bp.<sup>c</sup>Genes that are absent in the datasets for Figures 4 and 5.<sup>d</sup>Only sequences of protein-coding and rRNA genes are available.
