# Supplementary material for: The Complete Plastid Genome Sequence of Madagascar Periwinkle Catharanthus roseus (L.) G. Don: Plastid Genome Evolution, Molecular Marker Identification, and Phylogenetic Implications in Asterids
Source: PubMed Central journal article supplement (PMC3688999; doi:10.1371/journal.pone.0068518), 2013-06-18
Supplement: pone.0068518.s002.pdf [file pone.0068518.s002.pdf]

**Table S2.** Genes encoded in the *Catharanthus roseus* plastome.

| Functional category | Group of genes                               | Gene name                                                                                                                                                                                                                                                                                                                                                                                                                                                                  |
|---------------------|----------------------------------------------|----------------------------------------------------------------------------------------------------------------------------------------------------------------------------------------------------------------------------------------------------------------------------------------------------------------------------------------------------------------------------------------------------------------------------------------------------------------------------|
| Self-replication    | rRNA genes                                   | <i>rrn16<sup>c</sup>, rrn23<sup>c</sup>, rrn4.5<sup>c</sup>, rrn5<sup>c</sup>,</i>                                                                                                                                                                                                                                                                                                                                                                                         |
|                     | tRNA genes                                   | <i>trnA-UGC<sup>a,c</sup>, trnC-GCA, trnD-GUC, trnE-UUC, trnF-GAA, trnG-GCC, trnG-UCC<sup>a</sup>,<br/>trnH-GUG, trnI-CAU<sup>c</sup>, trnI-GAU<sup>a,c</sup>, trnK-UUU<sup>a</sup>, trnL-CAA<sup>c</sup>, trnL-UAA<sup>a</sup>, trnL-UAG,<br/>trnM-CAU, trnM-CAU, trnN-GUU<sup>c</sup>, trnP-UGG, trnQ-UUG, trnR-ACG<sup>c</sup>, trnR-UCU,<br/>trnS-GCU, trnS-GGA, trnS-UGA, trnT-GGU, trnT-UGU, trnV-GAC<sup>c</sup>, trnV-UAC<sup>a</sup>, trnW-<br/>CCA, trnY-GUA</i> |
|                     | Ribosomal small subunit                      | <i>rps2, rps3, rps4, rps7<sup>c</sup>, rps8, rps11, rps12_5'end, rps12_3'end<sup>a,c</sup>, rps14, rps15, rps16<sup>a</sup>,<br/>rps18, rps19</i>                                                                                                                                                                                                                                                                                                                          |
|                     | Ribosomal large subunit                      | <i>rpl2<sup>a,c</sup>, rpl14, rpl16<sup>a</sup>, rpl20, rpl22, rpl23<sup>c</sup>, rpl32, rpl33, rpl36</i>                                                                                                                                                                                                                                                                                                                                                                  |
|                     | DNA-dependent RNA polymerase                 | <i>rpoA, rpoB, rpoC1<sup>a</sup>, rpoC2</i>                                                                                                                                                                                                                                                                                                                                                                                                                                |
| Photosynthesis      | Large subunit of rubisco                     | <i>rbcL</i>                                                                                                                                                                                                                                                                                                                                                                                                                                                                |
|                     | Photosystem I                                | <i>psaA, psaB, psaC, psal, psaj, ycf3<sup>b</sup></i>                                                                                                                                                                                                                                                                                                                                                                                                                      |
|                     | Photosystem II                               | <i>psbA, psbB, psbC, psbD, psbE, psbF, psbH, psbl, psbj, psbk, psbl, psbm, psbn, psbt,<br/>psbZ</i>                                                                                                                                                                                                                                                                                                                                                                        |
|                     | NADH dehydrogenase                           | <i>ndhA<sup>a</sup>, ndhB<sup>a,c</sup>, ndhC, ndhD, ndhE, ndhF, ndhG, ndhH, ndhI, ndhJ, ndhK</i>                                                                                                                                                                                                                                                                                                                                                                          |
|                     | Cytochrome b/f complex                       | <i>petA, petB<sup>a</sup>, petD<sup>a</sup>, petG, petL, petN</i>                                                                                                                                                                                                                                                                                                                                                                                                          |
|                     | ATP synthase                                 | <i>atpA, atpB, atpE, atpF<sup>a</sup>, atpH, atpI</i>                                                                                                                                                                                                                                                                                                                                                                                                                      |
|                     | Other                                        |                                                                                                                                                                                                                                                                                                                                                                                                                                                                            |
|                     | Maturase                                     | <i>matK</i>                                                                                                                                                                                                                                                                                                                                                                                                                                                                |
|                     | Subunit of acetyl-CoA carboxylase            | <i>accD</i>                                                                                                                                                                                                                                                                                                                                                                                                                                                                |
|                     | Envelope membrane protein                    | <i>cemA</i>                                                                                                                                                                                                                                                                                                                                                                                                                                                                |
|                     | Protease                                     | <i>clpP<sup>b</sup></i>                                                                                                                                                                                                                                                                                                                                                                                                                                                    |
|                     | Translational initiation factor              | <i>infA</i>                                                                                                                                                                                                                                                                                                                                                                                                                                                                |
|                     | c-type cytochrome synthesis                  | <i>ccsA</i>                                                                                                                                                                                                                                                                                                                                                                                                                                                                |
| Functions unknown   | Conserved open reading frames ( <i>ycf</i> ) | <i>ycf1, ycf2<sup>c</sup>, ycf4, ycf15<sup>c</sup></i>                                                                                                                                                                                                                                                                                                                                                                                                                     |

<sup>a</sup> containing one intron.<sup>b</sup> containing two introns.<sup>c</sup> genes in the IR regions (i.e., have two copies in the plastome).
