# Supplementary material for: The Complete Plastid Genome Sequence of Madagascar Periwinkle Catharanthus roseus (L.) G. Don: Plastid Genome Evolution, Molecular Marker Identification, and Phylogenetic Implications in Asterids
Source: PubMed Central journal article supplement (PMC3688999; doi:10.1371/journal.pone.0068518), 2013-06-18
Supplement: pone.0068518.s003.pdf [file pone.0068518.s003.pdf]

**Table S3.** Distribution of simple sequence repeats in the *Catharanthus roseus* plastome.

| Repeat unit | Length (bp) | Number of SSRs | Start position (SSR-containing region) <sup>a, b</sup>                                                                                                                                                                                                                                                 |
|-------------|-------------|----------------|--------------------------------------------------------------------------------------------------------------------------------------------------------------------------------------------------------------------------------------------------------------------------------------------------------|
| A           | 10          | 1              | <b>82,752</b> ( <i>rpl14-rpl16</i> ) <sup>c</sup>                                                                                                                                                                                                                                                      |
|             | 11          | 1              | <b>121,737</b> ( <i>ndhA</i> intron) <sup>c</sup>                                                                                                                                                                                                                                                      |
|             | 12          | 2              | 4,778 ( <i>trnK-UUU-rps16</i> ), <b>115,432</b> ( <i>rpl32-trnL-UAG</i> )                                                                                                                                                                                                                              |
|             | 13          | 2              | <b>8,345</b> ( <i>psbI-trnS-GCU</i> ), <b>114,150</b> ( <i>ndhF-rpl32</i> )                                                                                                                                                                                                                            |
|             | 14          | 1              | 79,485 ( <i>petD-rpoA</i> )                                                                                                                                                                                                                                                                            |
|             | 15          | 1              | 45,392 ( <i>ycf3</i> intron 1)                                                                                                                                                                                                                                                                         |
| T           | 16          | 1              | <b>38,371</b> ( <i>rps14-psaB</i> )                                                                                                                                                                                                                                                                    |
|             | 10          | 8              | <b>1,714</b> ( <i>psbA-trnK-UUU</i> ), <b>29,386</b> ( <i>petN-psbM</i> ), 36,431 ( <i>psbC-trnS-UGA</i> ), <b>52,765</b> ( <i>ndhC-trnV-UAC</i> ), <b>52,934</b> ( <i>ndhC-trnV-UAC</i> ), 53,103 ( <i>trnV-UAC</i> intron), <b>58,668</b> ( <i>rbcL-accD</i> ), <b>113,997</b> ( <i>ndhF-rpl32</i> ) |
|             | 11          | 6              | <b>7,160</b> ( <i>rps16-trnQ-UUG</i> ), <b>8,126</b> ( <i>psbK-psbI</i> ), 18,495 ( <i>rpoC2</i> ), <b>44,882</b> ( <i>ycf3</i> intron 1), 61,293 ( <i>psaI-ycf4</i> ), <b>72,492</b> ( <i>clpP</i> intron 2)                                                                                          |
|             | 12          | 6              | <b>12,282</b> ( <i>atpF</i> intron), 54,032 ( <i>trnM-CAU-atpE</i> ), <b>72,136</b> ( <i>clpP</i> intron 2), <b>84,046</b> ( <i>rpl16</i> intron), 127,365 ( <i>ycf1</i> ), <b>127,849</b> ( <i>ycf1</i> )                                                                                             |
|             | 14          | 2              | <b>67,144</b> ( <i>psbE-petL</i> ), <b>121,980</b> ( <i>ndhA</i> intron)                                                                                                                                                                                                                               |
|             | 15          | 1              | 113,910 ( <i>ndhF-rpl32</i> )                                                                                                                                                                                                                                                                          |
|             | 16          | 1              | <b>81,657</b> ( <i>infA-rps8</i> )                                                                                                                                                                                                                                                                     |
|             | AT          | 10             | 1                                                                                                                                                                                                                                                                                                      |
|             | 12          | 1              | <b>119,967</b> ( <i>ndhG-ndhI</i> )                                                                                                                                                                                                                                                                    |
|             | 18          | 1              | <b>32,363</b> ( <i>trnE-UUC-trnT-GGU</i> )                                                                                                                                                                                                                                                             |
|             | TA          | 10             | <b>32,240</b> ( <i>trnE-UUC-trnT-GGU</i> ), <b>114,894</b> ( <i>rpl32-trnL-UAG</i> )                                                                                                                                                                                                                   |
|             | 14          | 1              | <b>48,084</b> ( <i>trnT-UGU-trnL-UAA</i> )                                                                                                                                                                                                                                                             |
|             | AAT         | 12             | 3                                                                                                                                                                                                                                                                                                      |
| AAG         | 12          | 1              | <b>2,957</b> ( <i>matK</i> )                                                                                                                                                                                                                                                                           |
| ATA         | 12          | 1              | <b>73,740</b> ( <i>clpP-psbB</i> )                                                                                                                                                                                                                                                                     |
| ATT         | 12          | 1              | <b>100,551</b> ( <i>rps12_3'-trnV-GAC</i> )                                                                                                                                                                                                                                                            |
| CTT         | 12          | 1              | <b>8,655</b> ( <i>trnS-GCU-trnG-UCC</i> )                                                                                                                                                                                                                                                              |
| AAAT        | 12          | 1              | <b>154,860</b> ( <i>rpl2-Ψrps19</i> )                                                                                                                                                                                                                                                                  |
| AAAG        | 12          | 1              | <b>111,365</b> ( <i>Ψycf1-ndhF</i> )                                                                                                                                                                                                                                                                   |
| ATTA        | 12          | 2              | 30,236 ( <i>petN-psbM</i> ), <b>32,635</b> ( <i>trnT-GGU-psbD</i> )                                                                                                                                                                                                                                    |
| ATTT        | 12          | 1              | <b>85,845</b> ( <i>rps19-rpl2</i> )                                                                                                                                                                                                                                                                    |
| TTTA        | 12          | 1              | 47,152 ( <i>rps4-trnT-UGU</i> )                                                                                                                                                                                                                                                                        |
| TCAA        | 12          | 1              | <b>4,604</b> ( <i>trnK-UUU-rps16</i> )                                                                                                                                                                                                                                                                 |
| TGAT        | 12          | 1              | <b>33,665</b> ( <i>trnT-GGU-psbD</i> )                                                                                                                                                                                                                                                                 |
| CATT        | 12          | 1              | 126,800 ( <i>ycf1</i> )                                                                                                                                                                                                                                                                                |
| AGATA       | 15          | 1              | <b>36,340</b> ( <i>psbC-psbZ</i> )                                                                                                                                                                                                                                                                     |

<sup>a</sup> If an SSR motif is found at the boundary between genic and intergenic regions, it is assigned to the region containing the major portion of it (e.g., (ATTA)<sub>4</sub>, (AGATA)<sub>3</sub>).

<sup>b</sup> SSRs not found in *Asclepias syriaca* are in bold.

<sup>c</sup> These two adjacent SSRs form a compound SSR, which is preceded by 33 A/T positions (TATATTTTATATTAATAAATTAATAAATAATATATATA).
