# Supplementary material for: The Complete Plastid Genome Sequence of Madagascar Periwinkle Catharanthus roseus (L.) G. Don: Plastid Genome Evolution, Molecular Marker Identification, and Phylogenetic Implications in Asterids
Source: PubMed Central journal article supplement (PMC3688999; doi:10.1371/journal.pone.0068518), 2013-06-18
Supplement: pone.0068518.s005.pdf [file pone.0068518.s005.pdf]

**Table S5.** Simple sequence repeats conserved in plastomes of *Catharanthus roseus* and *Asclepias syriaca*.

| Repeat unit | Length (bp) in <i>C. roseus</i> | Length (bp) in <i>A. syriaca</i> | Start position in <i>C. roseus</i> (SSR-containing region) |
|-------------|---------------------------------|----------------------------------|------------------------------------------------------------|
| A           | 12                              | 10                               | 4,778 ( <i>trnK-UUU-rps16</i> )                            |
|             | 14                              | 14                               | 79,485 ( <i>petD-rpoA</i> )                                |
|             | 15                              | 10                               | 45,392 ( <i>ycf3</i> intron 1)                             |
| T           | 10                              | 12                               | 36,431 ( <i>psbC-trnS-UGA</i> )                            |
|             | 10                              | 10                               | 53,103 ( <i>trnV-UAC</i> intron)                           |
|             | 11                              | 11                               | 18,495 ( <i>rpoC2</i> )                                    |
|             | 11                              | 10                               | 44,882 ( <i>ycf3</i> intron 1)                             |
|             | 11                              | 10                               | 61,293 ( <i>psaI-ycf4</i> )                                |
|             | 12                              | 14                               | 12,282 ( <i>atpF</i> intron)                               |
|             | 12                              | 11                               | 54,032 ( <i>trnM-CAU-atpE</i> )                            |
|             | 12                              | 12                               | 127,365 ( <i>ycf1</i> )                                    |
|             | 15                              | 12                               | 113,910 ( <i>ndhF-rpl32</i> )                              |
| ATTA        | 12                              | 12                               | 30,236 ( <i>petN-psbM</i> )                                |
| TTTA        | 12                              | 12                               | 47,152 ( <i>rps4-trnT-UGU</i> )                            |
| CATT        | 12                              | 12                               | 126,800 ( <i>ycf1</i> )                                    |
